# Supplementary material for: Dynamic and Physical Clustering of Gene Expression during Epidermal Barrier Formation in Differentiating Keratinocytes
Source: PLoS One. 2009 Oct 30;4(10):e7651. doi: 10.1371/journal.pone.0007651 (PMC2766255; doi:10.1371/journal.pone.0007651)
Supplement: Table S4 — Physical clusters of genes expressed in Keratinocytes during differentiation (0.06 MB XLS) [file pone.0007651.s005.xls]

## Sheet: Summary Table
Physical Cluster (pC)	Cluster Size (Mb)	CumMax	Expression cluster (exC)	Alignments	Gene Title	Gene Symbol	Chromosomal Location		Pure Paralogs	Mixed Paralogs
pC-KD1	0.458823	0.506488	5	chr1:42804378-42804656 (-)	solute carrier family 2 (facilitated glucose transporter), member 1	SLC2A1	1p35-p31.3
		0.506488	9	chr1:43043175-43045869 (-)	EBNA1 binding protein 2	EBNA1BP2	1p35-p33
		0.506488	5	chr1:43242390-43242835 (-)	elongation of very long chain fatty acids (FEN1/Elo2, SUR4/Elo3, yeast)-like 1	ELOVL1	1p34.1
		0.506488	5	chr1:43262900-43263201 (-)	mediator of RNA polymerase II transcription, subunit 8 homolog (yeast)	MED8	1p34.1
pC-KD2	0.368558	0.466475	2	chr1:46654399-46654852 (+)	cytochrome P450, family 4, subfamily B, polypeptide 1	CYP4B1	1p34-p12
		0.466475	2	chr1:47019364-47022957 (-)	membrane-associated protein 17	MAP17	1p33
pC-KD3	1.26214	0.560171	9	chr1:85206805-85207154 (-)	dimethylarginine dimethylaminohydrolase 1	DDAH1	1p22
		0.560171	10	chr1:85471511-85471811 (+)	cysteine-rich, angiogenic inducer, 61	CYR61	1p31-p22
		0.560171	5	chr1:86343948-86344640 (+)	chloride channel, calcium activated, family member 2	CLCA2	1p31-p22			1
		0.560171	6	chr1:86468446-86468940 (+)	chloride channel, calcium activated, family member 4	CLCA4	1p31-p22
pC-KD4	1.35262	4.1649	6	chr1:149295447-149295972 (-)	Homo sapiens trichohyalin (THH), mRNA	---	---			1
		4.1649	3	chr1:149491315-149491798 (-)	filaggrin	FLG	1q21
		4.1649	3	chr1:149704626-149705031 (+)	NICE-1 protein	NICE-1	1q21
		4.1649	3	chr1:149875880-149876408 (+)	small proline rich-like (epidermal differentiation complex) 1B	SPRL1B	1q21
		4.1649	11	chr1:149908987-149909316 (+)	Homo sapiens skin-specific protein (xp32) mRNA, partial cds	---	---
		4.1649	6	chr1:150100604-150101021 (+)	involucrin	IVL	1q21
		4.1649	6	chr1:150174659-150174804 (+)	small proline-rich protein 1A	SPRR1A	1q21-q22
		4.1649	3	chr1:150192315-150192794 (+)	small proline-rich protein 3	SPRR3	1q21-q22
		4.1649	5	chr1:150220278-150221887 (+)	small proline-rich protein 1B (cornifin)	SPRR1B	1q21-q22
		4.1649	3	chr1:150259679-150259897 (-)	small proline-rich protein 2B	SPRR2B	1q21-q22
		4.1649	3	chr1:150450778-150451123 (+)	loricrin	LOR	1q21
		4.1649	5	chr1:150519297-150519711 (-)	peptidoglycan recognition protein-I-beta precursor	PGLYRPIbeta	1q21
		4.1649	3	chr1:150547348-150550035 (+)	S100 calcium binding protein A9 (calgranulin B)	S100A9	1q21
		4.1649	6	chr1:150562848-150564636 (-)	S100 calcium binding protein A12 (calgranulin C)	S100A12	1q21
		4.1649	3	chr1:150579280-150579599 (-)	S100 calcium binding protein A8 (calgranulin A)	S100A8	1q21
		4.1649	6	chr1:150646895-150648067 (-)	S100 calcium binding protein A7 (psoriasin 1)	S100A7	1q21
pC-KD5	0.171156	0.450182	7	chr1:206867837-206869319 (-)	laminin, beta 3	LAMB3	1q32
		0.450182	10	chr1:206928532-206929035 (+)	putative lymphocyte G0/G1 switch gene	G0S2	1q32.2-q41
		0.450182	8	chr1:207038480-207038993 (-)	interferon regulatory factor 6	IRF6	1q32.3-q41
pC-KD6	0.470694	1.09959	7	chr2:113516022-113516521 (+)	solute carrier family 20 (phosphate transporter), member 1	SLC20A1	2q11-q14			1
		1.09959	8	chr2:113626996-113627511 (-)	interleukin 1, alpha	IL1A	2q14
		1.09959	8	chr2:113682506-113683053 (-)	interleukin 1, beta	IL1B	2q14
		1.09959	11	chr2:113769870-113770372 (+)	interleukin 1 family, member 7 (zeta)	IL1F7	2q12-q14.1
		1.09959	6	chr2:113837770-113838211 (+)	interleukin 1 family, member 9	IL1F9	2q12-q21
		1.09959	5	chr2:113986254-113986716 (+)	interleukin 1 receptor antagonist	IL1RN	2q14.2
pC-KD7	0.429014	0.657463	6	chr2:215999702-216001481 (-)	ATP-binding cassette, sub-family A (ABC1), member 12	ABCA12	2q34-q35
		0.657463	9	chr2:216412099-216416951 (+)	5-aminoimidazole-4-carboxamide ribonucleotide formyltransferase/IMP cyclohydrolase	ATIC	2q35
		0.657463	7	chr2:216428165-216428716 (-)	fibronectin 1	FN1	2q34
pC-KD8	1.28286	0.520668	4	chr2:234968133-234968490 (+)	UDP glycosyltransferase 1 family, polypeptide A10	UGT1A10	2q37
		0.520668	8	chr2:235688516-235689007 (-)	ADP-ribosylation factor-like 7	ARL7	2q37.2			1
		0.520668	10	chr2:235689190-235689686 (-)	ADP-ribosylation factor-like 7	ARL7	2q37.2
		0.520668	10	chr2:236250468-236250994 (+)	SH3-domain binding protein 4	SH3BP4	2q37.1-q37.2
pC-KD9	1.60572	0.41945	5	chr3:159867837-159868294 (+)	hypothetical protein FLJ14153	FLJ14153	3q25.32
		0.41945	9	chr3:160935507-160936016 (+)	schwannomin interacting protein 1	SCHIP1	3q25.33			1
		0.41945	10	chr3:161471156-161472514 (+)	SMC4 structural maintenance of chromosomes 4-like 1 (yeast)	SMC4L1	3q26.1
		0.41945	10	chr3:161473072-161473555 (+)	SMC4 structural maintenance of chromosomes 4-like 1 (yeast)	SMC4L1	3q26.1
pC-KD10	0.71296	0.620122	5	chr5:134762727-134762821 (-)	H2A histone family, member Y	H2AFY	5q31.3-q32
		0.620122	11	chr5:134986476-134990635 (-)	chemokine (C-X-C motif) ligand 14	CXCL14	5q31
		0.620122	1	chr5:135475142-135475687 (+)	transforming growth factor, beta-induced, 68kDa	TGFBI	5q31
pC-KD11	0.069225	0.764224	6	chr6:26223157-26232005 (-)	histone 1, H2bc	HIST1H2BC	6p21.3		1
		0.764224	6	chr6:26246769-26247292 (+)	---	HIST1H2AC	---
		0.764224	6	chr6:26266573-26279478 (+)	histone 1, H2bd	HIST1H2BD	6p21.3
		0.764224	5	chr6:26292002-26292382 (+)	histone 1, H2be	HIST1H2B	6p21.3
pC-KD12	0.805434	0.824483	10	chr6:30797882-30798414 (+)	beta 5-tubulin	OK/SW-cl.56	6p21.32
		0.824483	8	chr6:30817177-30817717 (-)	immediate early response 3	IER3	6p21.3
		0.824483	6	chr6:31189181-31189718 (-)	psoriasis susceptibility 1 candidate 1	PSORS1C1	6p21.3
		0.824483	3	chr6:31189983-31190505 (-)	corneodesmosin	CDSN	6p21.3
		0.824483	9	chr6:31216660-31216755 (-)	chromosome 6 open reading frame 18	C6orf18	6p21.3
		0.824483	9	chr6:31426604-31428227 (-)	major histocompatibility complex, class I, B	HLA-B	6p21.3
		0.824483	9	chr6:31484311-31487155 (+)	MHC class I polypeptide-related sequence A	MICA	6p21.3
		0.824483	10	chr6:31582710-31583210 (+)	MHC class I polypeptide-related sequence B	MICB	6p21.3
		0.824483	9	chr6:31602525-31603316 (-)	HLA-B associated transcript 1	BAT1	6p21.3
pC-KD13	0.546477	0.552239	8	chr7:115446410-115452096 (+)	testis derived transcript (3 LIM domains)	TES	7q31.2
		0.552239	10	chr7:115702527-115703077 (+)	caveolin 2	CAV2	7q31.1			1
		0.552239	7	chr7:115753551-115754038 (+)	caveolin 1, caveolae protein, 22kDa	CAV1	7q31.1
		0.552239	9	chr7:115990487-115991147 (+)	met proto-oncogene (hepatocyte growth factor receptor)	MET	7q31
		0.552239	10	chr7:115992374-115992887 (+)	met proto-oncogene (hepatocyte growth factor receptor)	MET	7q31
pC-KD14	1.74675	1.38391	8	chr10:3775404-3776386 (-)	core promoter element binding protein	COPEB	10p15			1
		1.38391	11	chr10:4968457-4974087 (+)	aldo-keto reductase family 1, member C1	AKR1C1	10p15-p14
		1.38391	11	chr10:4986028-4991992 (-)	aldo-keto reductase family 1, member C2	AKR1C2	10p15-p14
		1.38391	11	chr10:5098297-5103850 (+)	aldo-keto reductase family 1, member C3	AKR1C3	10p15-p14
		1.38391	3	chr10:5494744-5495255 (-)	calmodulin-like 5	CALML5	10p15.1
		1.38391	11	chr10:5521695-5522158 (+)	calmodulin-like 3	CALML3	10pter-p13
pC-KD15	2.28343	0.691574	2	chr10:93876629-93877170 (-)	insulin-degrading enzyme	IDE	10q23-q25
		0.691574	9	chr10:94079133-94079540 (+)	kinesin family member 11	KIF11	10q24.1
		0.691574	10	chr10:94730850-94731296 (-)	fer-1-like 3, myoferlin (C. elegans)	FER1L3	10q24
		0.691574	7	chr10:94952871-94953392 (+)	chromosome 10 open reading frame 3	C10orf3	10q23.33
		0.691574	2	chr10:96159732-96160057 (+)	cytochrome P450, family 2, subfamily C, polypeptide 18	CYP2C18	10q24
pC-KD16	0.255229	0.883403	11	chr12:51324649-51325109 (-)	keratin 2A (epidermal ichthyosis bullosa of Siemens)	KRT2A	12q11-q13		1
		0.883403	3	chr12:51354892-51355311 (-)	keratin 1 (epidermolytic hyperkeratosis)	KRT1	12q12-q13
		0.883403	5	chr12:51486626-51487027 (-)	keratin 4	KRT4	12q12-q13
		0.883403	9	chr12:51577463-51579878 (-)	keratin 8	KRT8	12q13
pC-KD17	2.7963	0.494861	8	chr12:88244378-88244863 (-)	dual specificity phosphatase 6	DUSP6	12q22-q23
		0.494861	4	chr12:90042270-90053367 (-)	decorin	DCN	12q13.2
		0.494861	2	chr12:90042309-90074769 (-)	decorin	DCN	12q13.2
		0.494861	2	chr12:91040361-91040677 (-)	B-cell translocation gene 1, anti-proliferative	BTG1	12q22
pC-KD18	0.762595	0.484144	10	chr13:75254026-75254567 (-)	potassium channel tetramerisation domain containing 12	KCTD12	13q22.1
		0.484144	4	chr13:75469720-75470243 (-)	protein associated with Myc	PAM	13q22
		0.484144	6	chr13:76009257-76016621 (+)	sciellin	SCEL	13q22
pC-KD19	0.28556	0.721627	6	chr15:61331616-61331951 (-)	hypothetical protein FLJ20151	FLJ20151	15q22.1
		0.721627	6	chr15:61331616-61332123 (-)	adaptor-related protein complex 1, gamma 1 subunit	AP1G1	16q23
		0.721627	5	chr15:61331961-61332383 (-)	hypothetical protein FLJ20151	FLJ20151	15q22.1
		0.721627	6	chr15:61332802-61333278 (-)	carbonic anhydrase XII	CA12	15q22
		0.721627	5	chr15:61616661-61617176 (-)	hect (homologous to the E6-AP (UBE3A) carboxyl terminus) domain and RCC1 (CHC1)-like domain (RLD) 1	HERC1	15q22
pC-KD20	0.235665	0.898813	10	chr16:56418316-56418720 (+)	metallothionein 2A	MT2A	16q13			1
		0.898813	10	chr16:56467998-56468443 (+)	---	---	---
		0.898813	7	chr16:56476102-56477343 (-)	metallothionein 1G	MT1G	16q13
		0.898813	10	chr16:56479831-56480401 (+)	metallothionein 1H	MT1H	16q13
		0.898813	10	chr16:56491802-56493358 (+)	metallothionein 1X	MT1X	16q13
		0.898813	9	chr16:56648291-56653981 (+)	KIAA0095 gene product	KIAA0095	16q13
pC-KD21	0.688636	0.443796	2	chr16:84906923-84907378 (+)	KIAA0513 gene product	KIAA0513	16q24.1
		0.443796	2	chr16:85487913-85488407 (+)	KIAA0182 protein	KIAA0182	16q24.1
		0.443796	9	chr16:85492776-85493332 (-)	DNA replication complex GINS protein PSF2	Pfs2	16q24.1
		0.443796	9	chr16:85594526-85595559 (-)	neighbor of COX4	NOC4	16q24
pC-KD22	0.047935	0.603364	1	chr17:8152437-8152846 (+)	arachidonate 15-lipoxygenase, second type	ALOX15B	17p13.1		1
		0.603364	3	chr17:8176640-8177597 (-)	arachidonate 12-lipoxygenase, 12R type	ALOX12B	17p13.1
		0.603364	6	chr17:8199955-8200372 (-)	arachidonate lipoxygenase 3	ALOXE3	17p13.1
pC-KD23	0.937061	1.07126	3	chr17:39347567-39348268 (-)	keratin 10 (epidermolytic hyperkeratosis; keratosis palmaris et plantaris)	KRT10	17q21			1
		1.07126	3	chr17:39452176-39454904 (-)	keratin 23 (histone deacetylase inducible)	KRT23	17q21.2
		1.07126	4	chr17:40043219-40045087 (-)	keratin 15	KRT15	17q21.2
		1.07126	8	chr17:40053244-40053877 (-)	keratin 19	KRT19	17q21.2
		1.07126	6	chr17:40139617-40140350 (-)	keratin 16 (focal non-epidermolytic palmoplantar keratoderma)	KRT16	17q12-q21
		1.07126	10	chr17:40219358-40219513 (+)	putative translation initiation factor	SUI1	17q21.31
		1.07126	5	chr17:40284074-40284628 (-)	junction plakoglobin	JUP	17q21
pC-KD24	0.296173	0.520884	2	chr18:12020340-12020712 (+)	inositol(myo)-1(or 4)-monophosphatase 2	IMPA2	18p11.2
		0.520884	5	chr18:12252845-12267210 (+)	cell death-inducing DFFA-like effector a	CIDEA	18p11.21
		0.520884	8	chr18:12316124-12316513 (+)	tubulin beta MGC4083	MGC4083	18p11.21
pC-KD25	0.558281	1.10033	4	chr18:26822394-26822832 (-)	desmocollin 3	DSC3	18q12.1			1
		1.10033	5	chr18:26899461-26900013 (-)	desmocollin 2	DSC2	18q12.1
		1.10033	3	chr18:26961368-26961733 (-)	desmocollin 1	DSC1	18q12.2
		1.10033	3	chr18:27187930-27188329 (+)	desmoglein 1	DSG1	18q12.1
		1.10033	5	chr18:27307864-27308409 (+)	desmoglein 3 (pemphigus vulgaris antigen)	DSG3	18q12.1-q12.2
		1.10033	10	chr18:27380294-27380675 (+)	desmoglein 2	DSG2	18q12.1
pC-KD26	0.266067	0.84532	3	chr18:59453894-59454257 (-)	serine (or cysteine) proteinase inhibitor, clade B (ovalbumin), member 4	SERPINB4	18q21.3		1
		0.84532	3	chr18:59471832-59472195 (-)	serine (or cysteine) proteinase inhibitor, clade B (ovalbumin), member 3	SERPINB3	18q21.3
		0.84532	5	chr18:59620986-59621507 (+)	serine (or cysteine) proteinase inhibitor, clade B (ovalbumin), member 7	SERPINB7	18q22.1
		0.84532	8	chr18:59719495-59719961 (+)	serine (or cysteine) proteinase inhibitor, clade B (ovalbumin), member 2	SERPINB2	18q21.3
pC-KD27	0.112129	0.422942	1	chr19:15087164-15087681 (-)	ilvB (bacterial acetolactate synthase)-like	ILVBL	19p13.1
		0.422942	6	chr19:15131499-15131991 (-)	Notch homolog 3 (Drosophila)	NOTCH3	19p13.2-p13.1
		0.422942	6	chr19:15198786-15199293 (-)	abhydrolase domain containing 9	ABHD9	19p13.13
pC-KD28	0.586081	1.49459	6	chr19:56138734-56144183 (-)	---	---	---			1
		1.49459	6	chr19:56153789-56154291 (-)	kallikrein 6 (neurosin, zyme)	KLK6	19q13.3
		1.49459	3	chr19:56172463-56175413 (-)	kallikrein 7 (chymotryptic, stratum corneum)	KLK7	19q13.41
		1.49459	2	chr19:56191169-56195322 (-)	kallikrein 8 (neuropsin/ovasin)	KLK8	19q13.3-q13.4
		1.49459	5	chr19:56209443-56209974 (-)	kallikrein 10	KLK10	19q13.3-q13.4
		1.49459	6	chr19:56217330-56218270 (-)	kallikrein 11	KLK11	19q13.3-q13.4
		1.49459	2	chr19:56251312-56251784 (-)	kallikrein 13	KLK13	19q13.3-q13.4
		1.49459	5	chr19:56714831-56724815 (-)	sialic acid binding Ig-like lectin 6	SIGLEC6	19q13.3
pC-KD29	0.151009	0.547262	3	chr20:44488930-44490567 (+)	protease inhibitor 3, skin-derived (SKALP)	PI3	20q12-q13
		0.547262	6	chr20:44566345-44568626 (-)	secretory leukocyte protease inhibitor (antileukoproteinase)	SLPI	20q12
		0.547262	8	chr20:44639398-44639939 (-)	syndecan 4 (amphiglycan, ryudocan)	SDC4	20q12
									4	11	15
									0.137931	0.37931	0.517241
