# Supplementary material for: Dynamic and Physical Clustering of Gene Expression during Epidermal Barrier Formation in Differentiating Keratinocytes
Source: PLoS One. 2009 Oct 30;4(10):e7651. doi: 10.1371/journal.pone.0007651 (PMC2766255; doi:10.1371/journal.pone.0007651)
Supplement: Table S5 — Immune genes expressed in Keratinocytes during differentiation (0.10 MB XLS) [file pone.0007651.s006.xls]

## Sheet: Summary Table
Cluster	Gene Title	Gene Symbol	Chromosomal Location
2	B-cell linker	BLNK	10q23.2-q23.33
2	interleukin 1 receptor, type I	IL1R1	2q12
2	tumor necrosis factor (ligand) superfamily, member 10	TNFSF10	3q26
4	interleukin 18 (interferon-gamma-inducing factor)	IL18	11q22.2-q22.3
4	2'-5'-oligoadenylate synthetase-like	OASL	12q24.2
4	interferon, gamma-inducible protein 30	IFI30	19p13.1
4	guanylate binding protein 2, interferon-inducible	GBP2	1p22.2
5	CD24 antigen (small cell lung carcinoma cluster 4 antigen)	CD24	6q21
6	aquaporin 9	AQP9	15q22.1-22.2
6	interleukin 1 family, member 9	IL1F9	2q12-q21
6	defensin, beta 1	DEFB1	8p23.2-p23.1
8	CD59 antigen p18-20	CD59	11p13
8	Rho GDP dissociation inhibitor (GDI) beta	ARHGDIB	12p12.3
8	coagulation factor III (thromboplastin, tissue factor)	F3	1p22-p21
8	Melanoma associated gene	D2S448	2p25
8	interleukin 1, alpha	IL1A	2q14
8	interleukin 1, beta	IL1B	2q14
9	interferon induced transmembrane protein 2 (1-8D)	IFITM2	11p15.5
9	complement component 1, q subcomponent binding protein	C1QBP	17p13.3
9	polymyositis/scleroderma autoantigen 1, 75kDa	PMSCL1	4q27
9	MHC class I polypeptide-related sequence A	MICA	6p21.3
9	major histocompatibility complex, class I, E	HLA-E	6p21.3
9	major histocompatibility complex, class I, F	HLA-F	6p21.3
9	major histocompatibility complex, class I, B	HLA-B	6p21.3
10	interferon-induced protein with tetratricopeptide repeats 1	IFIT1	10q25-q26
10	interferon induced transmembrane protein 3 (1-8U)	IFITM3	11p15.5
10	interferon induced transmembrane protein 1 (9-27)	IFITM1	11p15.5
10	interferon, alpha-inducible protein (clone IFI-15K)	G1P2	1p36.33
10	myxovirus (influenza virus) resistance 1, interferon-inducible protein p78 (mouse)	MX1	21q22.3
10	chemokine (C-X-C motif) ligand 1 (melanoma growth stimulating activity, alpha)	CXCL1	4q21
10	HLA-G histocompatibility antigen, class I, G	HLA-G	6p21.3
10	MHC class I polypeptide-related sequence B	MICB	6p21.3
11	interleukin 1 family, member 7 (zeta)	IL1F7	2q12-q14.1
11	chemokine (C-X-C motif) ligand 14	CXCL14	5q31
11	alpha-2-glycoprotein 1, zinc	AZGP1	7q22.1

## Sheet: Raw Data
cluster	gene namevalue	Probe Set ID	Transcript ID	Target Description	Representative Public ID	Archival UniGene Cluster	genome version	Alignments	Overlapping Transcripts	Gene Title	Gene Symbol	Chromosomal Location	UniGene ID	Ensembl	LocusLink	SwissProt	EC	OMIM	RefSeq Protein ID	RefSeq Transcript ID	FlyBase	AGI	WormBase	MGI Name	RGD Name	SGD accession number	Gene Ontology Biological Process	Gene Ontology Cellular Component	Gene Ontology Molecular Function	Pathway	Protein Families	Protein Domains	InterPro	Trans Membrane	QTL	gene namevalue	Score (d)	Numerator (r)	Denominator (s+s0)		C..Program.Files.R.rw1090.0a.CEL	C..Program.Files.R.rw1090.0b.CEL	C..Program.Files.R.rw1090.0c.CEL	C..Program.Files.R.rw1090.12a.CEL	C..Program.Files.R.rw1090.12b.CEL	C..Program.Files.R.rw1090.12c.CEL	C..Program.Files.R.rw1090.3a.CEL	C..Program.Files.R.rw1090.3b.CEL	C..Program.Files.R.rw1090.3c.CEL
2	207655_s_at	207655_s_at	Hs.167746.0	gb:NM_013314.1 /DEF=Homo sapiens B cell linker protein (SLP65), mRNA. /FEA=mRNA /GEN=SLP65 /PROD=B cell linker protein /DB_XREF=gi:7019534 /UG=Hs.167746 B cell linker protein /FL=gb:AF068180.1 gb:NM_013314.1	NM_013314	167746	July 2003 (NCBI 34)	chr10:97616078-97624452 (-)	NM_013314 // B-cell linker // chr10:97616043-97695913 (-)	B-cell linker	BLNK	10q23.2-q23.33	Hs.167746	ENSG00000095585	29760	O75498 /// O75499 /// Q8WV28	---	604515	NP_037446	NM_013314	---	---	---	---	---	---	6954 // inflammatory response // predicted/computed /// 6959 // humoral immune response // predicted/computed /// 7242 // intracellular signaling cascade // experimental evidence /// 7516 // hemocyte development // experimental evidence	5737 // cytoplasm // not recorded	5068 // transmembrane receptor protein tyrosine kinase adaptor protein activity // experimental evidence	---	---	scop // d1qada_ // d1qada_ SCOP:d.93.1.1:| Phosphatidylinositol 3-kinase, p85-alpha subunit // 1.2E-24 /// pfam // SH2 // SH2 domain // 1.1E-10	IPR000980 // SH2 motif	---	---	207655_s_at	1.00471	0.880305	0.876182		-2.66873	-3.32888	-2.87383	-1.2344	-1.05747	-1.12689	-1.50508	-1.6935	-1.25453
2	202948_at	202948_at	Hs.82112.0	gb:NM_000877.1 /DB_XREF=gi:4504658 /GEN=IL1R1 /FEA=FLmRNA /CNT=156 /TID=Hs.82112.0 /TIER=FL+Stack /STK=49 /UG=Hs.82112 /LL=3554 /DEF=Homo sapiens interleukin 1 receptor, type I (IL1R1), mRNA. /PROD=interleukin 1 receptor, type I /FL=gb:NM_000877.1 gb:M27492.1	NM_000877	82112	July 2003 (NCBI 34)	chr2:102417165-102417698 (+)	NM_000877 // interleukin 1 receptor, type I precursor // chr2:102391801-102417734 (+)	interleukin 1 receptor, type I	IL1R1	2q12	Hs.82112	ENSG00000115594	3554	P14778	---	147810	NP_000868	NM_000877	---	---	---	---	---	---	6954 // inflammatory response // not recorded /// 6955 // immune response // traceable author statement /// 7166 // cell surface receptor linked signal transduction // traceable author statement	5887 // integral to plasma membrane // traceable author statement	4888 // transmembrane receptor activity // traceable author statement /// 4909 // interleukin-1, Type I, activating receptor activity // traceable author statement	---	---	scop // d1fywa_ // d1fywa_ SCOP:c.23.2.1:| Toll-like receptor 2, TLR2 // 2.13E-23 /// scop // d1iray1 // d1iray1 SCOP:b.1.1.4:| Type-1 interleukin-1 receptor // 1.0E-20 /// pfam // TIR // TIR domain // 1.2E-53	IPR000157 // TIR /// IPR004074 // Interleukin-1 receptor, type I and type II /// IPR004075 // Interleukin-1 receptor, type I/Toll precursor /// IPR004076 // Interleukin-1 receptor IL1R /// IPR007110 // Immunoglobulin-like /// IPR003599 // Immunoglobulin subtype	NP_000868 // 1 // 0.03422	---	202948_at	1.03305	0.707621	0.684981		-2.94186	-2.78799	-2.41567	-1.36201	-0.980095	-1.36498	-1.50074	-1.50653	-1.6612
2	202687_s_at 202688_at 214329_x_at	202687_s_at	Hs.83429.0	gb:U57059.1 /DEF=Homo sapiens Apo-2 ligand mRNA, complete cds. /FEA=mRNA /PROD=Apo-2 ligand /DB_XREF=gi:1336207 /UG=Hs.83429 tumor necrosis factor (ligand) superfamily, member 10 /FL=gb:U37518.1 gb:U57059.1 gb:NM_003810.1	NM_003810	83429	July 2003 (NCBI 34)	chr3:173545187-173547974 (-)	NM_003810 // tumor necrosis factor (ligand) superfamily, member 10 // chr3:173545088-173562177 (-)	tumor necrosis factor (ligand) superfamily, member 10	TNFSF10	3q26	Hs.387871	ENSG00000121858	8743	P50591	---	603598	NP_003801	NM_003810	---	---	---	---	---	---	6915 // apoptosis // inferred from electronic annotation /// 6917 // induction of apoptosis // traceable author statement /// 6955 // immune response // inferred from electronic annotation /// 7165 // signal transduction // traceable author statement /// 7267 // cell-cell signaling // traceable author statement	5625 // soluble fraction // traceable author statement /// 5887 // integral to plasma membrane // traceable author statement	5164 // tumor necrosis factor receptor binding // inferred from electronic annotation	---	---	scop // d1dg6a_ // d1dg6a_ SCOP:b.22.1.1:| Apoptosis-2 ligand, apo2l/TRAIL // 1.15E-47 /// pfam // TNF // TNF(Tumour Necrosis Factor) family // 2.9E-13	IPR003636 // Tumour necrosis factor subfamily /// IPR006052 // Tumor Necrosis Factor /// IPR008983 // TNF-like	NP_003801 // 1 // 0.48594	---	202687_s_at 202688_at 214329_x_at	1.54534	1.00289	0.64898		-3.68208	-3.57982	-3.40947	-1.81701	-2.41457	-2.15307	-2.28048	-2.56147	-3.16265
4	217014_s_at	217014_s_at	Hs.307354.0	Consensus includes gb:AC004522 /DEF=Homo sapiens PAC clone RP4-604G5 from 7q22-q31.1 /FEA=CDS_1 /DB_XREF=gi:3006227 /UG=Hs.307354 Homo sapiens PAC clone RP4-604G5 from 7q22-q31.1	AC004522	---	July 2003 (NCBI 34)	chr7:99192352-99196432 (+)	BC022382 // Homo sapiens gap junction protein, epsilon 1, 29kDa, mRNA (cDNA clone IMAGE:4249087), containing frame-shift errors. // chr7:99189785-99204368 (+)	---	---	---	---	---	---	---	---	---	---	---	---	---	---	---	---	---	6955 // MHC_I;immune response;2.6e-96 // extended:inferred from electronic annotation	---	---	---	---	---	---	---	---	217014_s_at	1.15425	0.796687	0.690221		-0.388848	-0.621961	-1.19605	-0.0997869	0.120147	-0.439653	-0.11499	0.546819	0.959898
4	206295_at	206295_at	Hs.83077.0	gb:NM_001562.1 /DB_XREF=gi:4504652 /GEN=IL18 /FEA=FLmRNA /CNT=19 /TID=Hs.83077.0 /TIER=FL /STK=3 /UG=Hs.83077 /LL=3606 /DEF=Homo sapiens interleukin 18 (interferon-gamma-inducing factor) (IL18), mRNA. /PROD=interleukin 18 /FL=gb:NM_001562.1 gb:AF077611.1 gb:D49950.1	NM_001562	83077	July 2003 (NCBI 34)	chr11:111551731-111552190 (-)	NM_001562 // interleukin 18 proprotein // chr11:111551967-111563422 (-)	interleukin 18 (interferon-gamma-inducing factor)	IL18	11q22.2-q22.3	Hs.83077	ENSG00000150782	3606	Q14116 /// Q96KJ8	---	600953	NP_001553	NM_001562	---	---	---	---	---	---	1525 // angiogenesis // inferred from direct assay /// 6955 // immune response // traceable author statement /// 7267 // cell-cell signaling // traceable author statement /// 8625 // induction of apoptosis via death domain receptors // inferred from sequence or structural similarity /// 30155 // regulation of cell adhesion // inferred from direct assay /// 30431 // sleep // inferred from sequence…	5576 // extracellular // traceable author statement	4871 // signal transducer activity // traceable author statement /// 5149 // interleukin-1 receptor binding // inferred from electronic annotation /// 16506 // apoptosis activator activity // inferred from sequence or structural similarity	---	---	---	IPR000975 // Interleukin-1 /// IPR008996 // Cytokine, IL-1 related	---	---	206295_at	1.30712	0.79245	0.606257		-1.33381	-1.07873	-0.710804	-0.532807	-0.508257	-0.501914	0.184064	-0.010205	0.357348
4	205660_at 210797_s_at	205660_at	Hs.118633.0	gb:NM_003733.1 /DB_XREF=gi:11321576 /GEN=OASL /FEA=FLmRNA /CNT=27 /TID=Hs.118633.0 /TIER=FL /STK=5 /UG=Hs.118633 /LL=8638 /DEF=Homo sapiens 2-5oligoadenylate synthetase-like (OASL), mRNA. /PROD=2-5oligoadenylate synthetase-like /FL=gb:AF063611.1 gb:NM_003733.1	NM_003733	118633	July 2003 (NCBI 34)	chr12:119870180-119870432 (-)	NM_003733 // 2'-5'-oligoadenylate synthetase-like isoform a // chr12:119870047-119888733 (-) /// NM_198213 // 2'-5'-oligoadenylate synthetase-like isoform b // chr12:119870047-119888733 (-)	2'-5'-oligoadenylate synthetase-like	OASL	12q24.2	Hs.118633	ENSG00000135114	8638	Q15646	---	603281	NP_003724 /// NP_937856	NM_003733 /// NM_198213	---	---	---	---	---	---	6955 // immune response // inferred from electronic annotation	5730 // nucleolus // traceable author statement /// 5737 // cytoplasm // traceable author statement	3677 // DNA binding // traceable author statement /// 3725 // double-stranded RNA binding // traceable author statement /// 5524 // ATP binding // inferred from electronic annotation /// 16740 // transferase activity // inferred from electronic annotation /// 46966 // thyroid hormone receptor binding // traceable author statement	---	---	scop // d1ubi__ // d1ubi__ SCOP:d.15.1.1:| Ubiquitin // 7.22E-19 /// pfam // ubiquitin // Ubiquitin family // 4.1E-22	IPR000626 // Ubiquitin /// IPR006117 // 2-5-oligoadenylate synthetase /// IPR006116 // 2-5 oligoadenylate synthetase ubiquitin-like domain /// IPR001201 // PAP/25A core domain	---	---	205660_at 210797_s_at	1.28644	0.861944	0.670021		-1.20486	-1.02427	-1.11435	-0.250949	-0.120513	-0.435077	0.227519	0.255741	0.230939
4	201422_at	201422_at	Hs.14623.0	gb:NM_006332.1 /DB_XREF=gi:5453695 /GEN=IFI30 /FEA=FLmRNA /CNT=270 /TID=Hs.14623.0 /TIER=FL+Stack /STK=148 /UG=Hs.14623 /LL=10437 /DEF=Homo sapiens interferon, gamma-inducible protein 30 (IFI30), mRNA. /PROD=interferon, gamma-inducible protein 30 /FL=gb:J03909.1 gb:NM_006332.1 gb:AF097362.1	NM_006332	14623	July 2003 (NCBI 34)	chr19:18147412-18149893 (+)	NM_006332 // interferon, gamma-inducible protein 30 preproprotein // chr19:18145578-18149927 (+)	interferon, gamma-inducible protein 30	IFI30	19p13.1	Hs.14623	ENSG00000105648	10437	BAC85622 /// BAC98466 /// Q8NEI4 /// Q8WU77 /// Q96P99	---	604664	NP_006323	NM_006332	---	---	---	---	---	---	6955 // immune response // inferred from electronic annotation	5576 // extracellular // traceable author statement /// 5764 // lysosome // traceable author statement	16491 // oxidoreductase activity // inferred from electronic annotation	---	---	pfam // GILT // Gamma interferon inducible lysosomal thiol reductase (GILT) // 2.6E-24	IPR004911 // Gamma interferon inducible lysosomal thiol reductase GILT	---	---	201422_at	1.32659	0.676089	0.509646		0.45989	0.241977	-0.018518	0.49454	0.281558	0.122939	0.65734	1.15296	0.972142
4	202748_at	202748_at	Hs.171862.0	gb:NM_004120.2 /DB_XREF=gi:6996011 /GEN=GBP2 /FEA=FLmRNA /CNT=107 /TID=Hs.171862.0 /TIER=FL /STK=1 /UG=Hs.171862 /LL=2634 /DEF=Homo sapiens guanylate binding protein 2, interferon-inducible (GBP2), mRNA. /PROD=guanylate binding protein 2,interferon-inducible /FL=gb:M55543.1 gb:NM_004120.2	NM_004120	171862	July 2003 (NCBI 34)	chr1:89040633-89042865 (-)	NM_004120 // guanylate binding protein 2, interferon-inducible // chr1:89040222-89058712 (-)	guanylate binding protein 2, interferon-inducible	GBP2	1p22.2	Hs.386567	ENSG00000162645	2634	P32456 /// Q8N8V2 /// Q8TCE5	---	600412	NP_004111	NM_004120	---	---	---	---	---	---	6955 // immune response // traceable author statement	---	3924 // GTPase activity // inferred from electronic annotation /// 5525 // GTP binding // traceable author statement	---	---	scop // d1f5na1 // d1f5na1 SCOP:a.114.1.1:| Interferon-induced guanylate-binding protein 1 (GBP1), C-terminal domain // 2.03E-132 /// scop // d1f5na2 // d1f5na2 SCOP:c.37.1.8:| Interferon-induced guanylate-binding protein 1 (GBP1), N-terminal domain // 3.44E-113 /// pfam // GBP // Guanylate-binding protein, N-terminal domain // 8.9E-180 /// pfam // GBP_C // Guanylate-binding protein, C-terminal d…	IPR003191 // Guanylate-binding protein	---	---	202748_at	1.407	0.651637	0.463139		-2.32779	-2.17049	-1.97158	-1.98984	-1.95432	-2.5579	-2.85962	-2.67306	-2.58594
5	266_s_at 208650_s_at 208651_x_at 209771_x_at 209772_s_at	266_s_at	L33930	L33930 /FEATURE= /DEFINITION=HUMCD24B Homo sapiens CD24 signal transducer mRNA, complete cds and 3' region	L33930	---	July 2003 (NCBI 34)	chrY:20047753-20048232 (-)	NM_013230 // CD24 antigen (small cell lung carcinoma cluster 4 antigen) // chrY:20048102-20049767 (-)	CD24 antigen (small cell lung carcinoma cluster 4 antigen)	CD24	6q21	Hs.375108	ENSG00000185275	934	AAP36068 /// P25063	---	600074	NP_037362	NM_013230	---	---	---	---	---	---	6959 // humoral immune response // traceable author statement	5886 // plasma membrane // not recorded	---	---	---	---	---	NP_037362 // 1 // 0.92477	---	266_s_at 208650_s_at 208651_x_at 209771_x_at 209772_s_at	1.01204	0.733395	0.724672		1.46822	1.3732	1.64562	3.75084	3.62947	3.45483	2.9006	3.68762	3.86254
6	205568_at	205568_at	Hs.104624.0	gb:NM_020980.2 /DB_XREF=gi:11038652 /GEN=AQP9 /FEA=FLmRNA /CNT=33 /TID=Hs.104624.0 /TIER=FL+Stack /STK=13 /UG=Hs.104624 /LL=366 /DEF=Homo sapiens aquaporin 9 (AQP9), mRNA. /PROD=aquaporin 9 /FL=gb:AF016495.1 gb:NM_020980.2 gb:AB008775.1	NM_020980	104624	July 2003 (NCBI 34)	chr15:56193663-56194030 (+)	NM_020980 // aquaporin 9 // chr15:56146534-56194165 (+)	aquaporin 9	AQP9	15q22.1-22.2	Hs.104624	ENSG00000103569	366	O43315	---	602914	NP_066190	NM_020980	---	---	---	---	---	---	6810 // transport // traceable author statement /// 6833 // water transport // traceable author statement /// 6955 // immune response // traceable author statement	5887 // integral to plasma membrane // traceable author statement	5215 // transporter activity // inferred from electronic annotation /// 15250 // water channel activity // traceable author statement	---	---	scop // d1fx8a_ // d1fx8a_ SCOP:f.2.1.5:| Glycerol uptake facilitator protein GlpF // 2.09E-72 /// pfam // MIP // Major intrinsic protein // 8.1E-56	IPR000425 // Major intrinsic protein	NP_066190 // 6 // 0.56233	---	205568_at	2.25065	1.30114	0.578115		-1.02205	-0.728971	-0.744678	2.78489	2.61696	2.86329	2.06725	2.39825	1.97156
6	220322_at	220322_at	Hs.211238.0	gb:NM_019618.1 /DEF=Homo sapiens interleukin-1 homolog 1 (IL-1H1), mRNA. /FEA=mRNA /GEN=IL-1H1 /PROD=interleukin-1 homolog 1 /DB_XREF=gi:9665233 /UG=Hs.211238 interleukin-1 homolog 1 /FL=gb:AF206696.1 gb:AF200492.1 gb:NM_019618.1	NM_019618	211238	July 2003 (NCBI 34)	chr2:113837770-113838211 (+)	NM_019618 // interleukin 1 family, member 9 // chr2:113830751-113838373 (+)	interleukin 1 family, member 9	IL1F9	2q12-q21	Hs.211238	ENSG00000136688	56300	AAQ89469 /// Q9NZH8	---	605542	NP_062564	NM_019618	---	---	---	---	---	---	6955 // immune response // inferred from electronic annotation /// 7267 // cell-cell signaling // traceable author statement /// 9613 // response to pest/pathogen/parasite // traceable author statement	5576 // extracellular // inferred from electronic annotation	5152 // interleukin-1 receptor antagonist activity // inferred from electronic annotation /// 5149 // IL1;interleukin-1 receptor binding;9.3e-12 // extended:Unknown	---	---	scop // d1ilr1_ // d1ilr1_ SCOP:b.42.1.2:| Interleukin-1 receptor antagonist protein // 3.76E-46 /// pfam // IL1 // Interleukin-1 / 18 // 9.1E-12	IPR000975 // Interleukin-1 /// IPR003297 // Interleukin-1 receptor antagonist IL1RA /// IPR008996 // Cytokine, IL-1 related	---	---	220322_at	1.82402	1.06991	0.586568		-1.46469	-1.72471	-2.44831	1.11353	1.02957	0.859404	0.683741	0.652639	0.889296
6	210397_at	210397_at	Hs.32949.0	gb:U73945.1 /DB_XREF=gi:1755147 /FEA=FLmRNA /CNT=26 /TID=Hs.32949.0 /TIER=FL /STK=0 /UG=Hs.32949 /LL=1672 /UG_GENE=DEFB1 /DEF=Human beta-defensin-1 mRNA, complete cds. /PROD=beta-defensin-1 /FL=gb:U73945.1 gb:NM_005218.2	U73945	32949	July 2003 (NCBI 34)	chr8:6715599-6722824 (-)	NM_005218 // defensin, beta 1, preproprotein // chr8:6715523-6715711 (-)	defensin, beta 1	DEFB1	8p23.2-p23.1	Hs.32949	ENSG00000164825	1672	P60022	---	602056	NP_005209	NM_005218	---	---	---	---	---	---	6805 // xenobiotic metabolism // inferred from electronic annotation /// 6935 // chemotaxis // traceable author statement /// 6955 // immune response // traceable author statement /// 7186 // G-protein coupled receptor protein signaling pathway // traceable author statement /// 19735 // antimicrobial humoral response (sensu Vertebrata) // traceable author statement	5576 // extracellular // inferred from electronic annotation	3795 // antimicrobial peptide activity // traceable author statement	---	---	scop // d1ijva_ // d1ijva_ SCOP:g.9.1.1:| Beta-defensin, BD // 7.78E-17 /// pfam // Defensin_beta // Beta defensin // 0.0036	---	---	---	210397_at	1.52328	1.15618	0.759008		-1.92311	-1.15112	-0.619072	2.02407	1.93291	1.59942	1.51712	1.82118	2.00869
8	200983_x_at 200984_s_at 200985_s_at	200983_x_at	Hs.119663.0	gb:BF983379 /DB_XREF=gi:12386191 /DB_XREF=602305270F1 /CLONE=IMAGE:4396576 /FEA=FLmRNA /CNT=428 /TID=Hs.119663.0 /TIER=Stack /STK=83 /UG=Hs.119663 /LL=966 /UG_GENE=CD59 /UG_TITLE=CD59 antigen p18-20 (antigen identified by monoclonal antibodies 16.3A5, EJ16, EJ30, EL32 and G344) /FL=gb:NM_000611.1 gb:M34671.1	BF983379	119663	July 2003 (NCBI 34)	chr11:33695904-33717303 (-)	NM_000611 // CD59 antigen p18-20 (antigen identified by monoclonal antibodies 16.3A5, EJ16, EJ30, EL32 and G344) // chr11:33695977-33722291 (-)	CD59 antigen p18-20 (antigen identified by monoclonal antibodies 16.3A5, EJ16, EJ30, EL32 and G344)	CD59	11p13	Hs.278573	ENSG00000085063	966	AAP35768 /// P13987	---	107271	NP_000602	NM_000611	---	---	---	---	---	---	6955 // immune response // not recorded /// 7166 // cell surface receptor linked signal transduction // traceable author statement /// 7596 // blood coagulation // traceable author statement	5624 // membrane fraction // traceable author statement /// 5886 // plasma membrane // not recorded	---	---	---	scop // d1erh__ // d1erh__ SCOP:g.7.1.3:| CD59 // 2.04E-29 /// pfam // UPAR_LY6 // u-PAR/Ly-6 domain // 9.2E-32	IPR003632 // Cell-surface glycoprotein Ly-6/CD59 /// IPR001526 // CD59 antigen	---	---	200983_x_at 200984_s_at 200985_s_at	1.35856	0.759863	0.559314		3.61272	3.67218	3.76621	3.15743	3.03012	3.20265	3.25342	3.47885	3.6181
8	201288_at	201288_at	Hs.83656.0	gb:NM_001175.1 /DB_XREF=gi:10835001 /GEN=ARHGDIB /FEA=FLmRNA /CNT=466 /TID=Hs.83656.0 /TIER=FL+Stack /STK=151 /UG=Hs.83656 /LL=397 /DEF=Homo sapiens Rho GDP dissociation inhibitor (GDI) beta (ARHGDIB), mRNA. /PROD=Rho GDP dissociation inhibitor (GDI) beta /FL=gb:NM_001175.1 gb:L20688.1	NM_001175	83656	July 2003 (NCBI 34)	chr12:14986282-14986824 (-)	NM_001175 // Rho GDP dissociation inhibitor (GDI) beta // chr12:14986231-15005779 (-)	Rho GDP dissociation inhibitor (GDI) beta	ARHGDIB	12p12.3	Hs.292738	ENSG00000111348	397	P52566	---	602843	NP_001166	NM_001175	---	---	---	---	---	---	6955 // immune response // traceable author statement /// 7162 // negative regulation of cell adhesion // traceable author statement /// 7266 // Rho protein signal transduction // traceable author statement /// 7275 // development // traceable author statement /// 30036 // actin cytoskeleton organization and biogenesis // traceable author statement	16023 // cytoplasmic vesicle // traceable author statement	5094 // Rho GDP-dissociation inhibitor activity // traceable author statement /// 5096 // GTPase activator activity // inferred from electronic annotation	G13_Signaling_Pathway	---	scop // d1fsoa_ // d1fsoa_ SCOP:b.1.1.5:| Rho GDP-dissociation inhibitor 1, RhoGDI // 2.09E-54 /// pfam // Rho_GDI // RHO protein GDP dissociation inhibitor // 9.4E-149	IPR000406 // RHO protein GDP dissociation inhibitor	---	---	201288_at	1.36243	0.776166	0.569693		2.32266	1.92522	2.22049	1.4018	1.47554	1.52552	2.24467	1.99132	2.38661
8	204363_at	204363_at	Hs.62192.0	gb:NM_001993.2 /DB_XREF=gi:10518499 /GEN=F3 /FEA=FLmRNA /CNT=63 /TID=Hs.62192.0 /TIER=FL+Stack /STK=15 /UG=Hs.62192 /LL=2152 /DEF=Homo sapiens coagulation factor III (thromboplastin, tissue factor) (F3), mRNA. /PROD=coagulation factor III precursor /FL=gb:M16553.1 gb:M27436.1 gb:J02931.1 gb:NM_001993.2	NM_001993	62192	July 2003 (NCBI 34)	chr1:94466797-94467196 (-)	NM_001993 // coagulation factor III precursor // chr1:94466674-94469786 (-)	coagulation factor III (thromboplastin, tissue factor)	F3	1p22-p21	Hs.62192	ENSG00000117525	2152	P13726 /// Q86SE7 /// Q86WH3 /// Q86WH4 /// Q8NCW7	---	134390	NP_001984	NM_001993	---	---	---	---	---	---	6955 // immune response // not recorded /// 7596 // blood coagulation // not recorded	5886 // plasma membrane // not recorded /// 16021 // integral to membrane // traceable author statement	3801 // blood coagulation factor activity // traceable author statement /// 4896 // hematopoietin/interferon-class (D200-domain) cytokine receptor activity // inferred from electronic annotation	---	---	scop // d2hft_1 // d2hft_1 SCOP:b.1.2.1:| Extracellular region of human tissue factor // 7.8E-35 /// pfam // Tissue_fac // Tissue factor // 1.6E-248	IPR001187 // Tissue factor /// IPR000282 // Cytokine receptor class 2 /// IPR008957 // Fibronectin, type III-like fold	NP_001984 // 1 // 0.4226	---	204363_at	1.44686	0.694364	0.479911		3.3735	3.56175	3.70611	2.98086	3.09639	2.81536	1.87284	1.32172	1.82352
8	212012_at 212013_at	212012_at	Hs.118893.0	gb:BF342851 /DB_XREF=gi:11289878 /DB_XREF=602015135F1 /CLONE=IMAGE:4150664 /FEA=mRNA /CNT=397 /TID=Hs.118893.0 /TIER=Stack /STK=116 /UG=Hs.118893 /LL=7837 /UG_GENE=D2S448 /UG_TITLE=Melanoma associated gene	BF342851	118893	July 2003 (NCBI 34)	chr2:3026153-3026525 (+)	AF200348 // Homo sapiens melanoma-associated antigen MG50 mRNA, partial cds. // chr2:2913962-3026622 (+)	Melanoma associated gene	D2S448	2p25	Hs.118893	ENSG00000130508	7837	AAH09496 /// Q92626 /// Q96GF5	---	605158	---	---	---	---	---	---	---	---	6955 // immune response // non-traceable author statement	---	4601 // peroxidase activity // inferred from electronic annotation /// 5152 // interleukin-1 receptor antagonist activity // non-traceable author statement	---	---	---	IPR007110 // Immunoglobulin-like /// IPR001007 // von Willebrand factor, type C /// IPR001611 // Leucine-rich repeat /// IPR000483 // Cysteine-rich flanking region, C-terminal /// IPR002007 // Animal haem peroxidase /// IPR003591 // Leucine-rich repeat, typical subtype /// IPR000372 // Cysteine-rich flanking region, N-terminal /// IPR003598 // Immunoglobulin C-2 type /// IPR010255 // Haem peroxid…	---	---	212012_at 212013_at	0.934149	0.480184	0.514034		0.634422	0.331235	0.0117099	-0.398008	-0.131807	-0.126347	-0.0264821	-0.171463	-0.00125198
8	210118_s_at	210118_s_at	Hs.1722.1	gb:M15329.1 /DB_XREF=gi:186277 /GEN=IL1A /FEA=FLmRNA /CNT=29 /TID=Hs.1722.1 /TIER=FL /STK=0 /UG=Hs.1722 /LL=3552 /DEF=Human interleukin 1-alpha (IL1A) mRNA, complete cds. /PROD=interleukin 1-alpha /FL=gb:M15329.1	M15329	1722	July 2003 (NCBI 34)	chr2:113626996-113627511 (-)	NM_000575 // interleukin 1, alpha proprotein // chr2:113626640-113637215 (-)	interleukin 1, alpha	IL1A	2q14	Hs.1722	ENSG00000115008	3552	AAP35660 /// P01583	---	147760	NP_000566	NM_000575	---	---	---	---	---	---	74 // regulation of cell cycle // inferred from electronic annotation /// 6915 // apoptosis // traceable author statement /// 6916 // anti-apoptosis // traceable author statement /// 6935 // chemotaxis // not recorded /// 6954 // inflammatory response // traceable author statement /// 6955 // immune response // inferred from electronic annotation /// 7267 // cell-cell signaling // not recorded //…	5615 // extracellular space // traceable author statement /// 5737 // cytoplasm // not recorded	4871 // signal transducer activity // traceable author statement /// 5149 // interleukin-1 receptor binding // inferred from electronic annotation	---	---	scop // d2ila__ // d2ila__ SCOP:b.42.1.2:| Interleukin-1alpha // 4.1E-56 /// pfam // IL1 // Interleukin-1 / 18 // 5.0E-68 /// pfam // IL1_propep // Interleukin-1 propeptide // 2.8E-54	IPR000975 // Interleukin-1 /// IPR003502 // Interleukin-1 propeptide /// IPR003294 // Interleukin-1, alpha/beta /// IPR003295 // Interleukin-1, alpha IL1A /// IPR010916 // TONB Box N terminus /// IPR008996 // Cytokine, IL-1 related	---	---	210118_s_at	1.4333	1.05078	0.733118		2.83888	3.27457	2.56405	1.87089	1.96016	2.49322	1.63089	0.996404	2.18468
8	39402_at 205067_at	39402_at	4881243_RC	Cluster Incl. M15330:Human interleukin 1-beta (IL1B) mRNA, complete cds /cds=(86,895) /gb=M15330 /gi=186283 /ug=Hs.126256 /len=1497	M15330	126256	July 2003 (NCBI 34)	chr2:113682506-113683053 (-)	NM_000576 // interleukin 1, beta proprotein // chr2:113682485-113689472 (-)	interleukin 1, beta	IL1B	2q14	Hs.126256	ENSG00000125538	3553	AAP35877 /// O43645 /// P01584	---	147720	NP_000567	NM_000576	---	---	---	---	---	---	74 // regulation of cell cycle // inferred from electronic annotation /// 6915 // apoptosis // traceable author statement /// 6954 // inflammatory response // non-traceable author statement /// 6955 // immune response // inferred from electronic annotation /// 7165 // signal transduction // traceable author statement /// 7267 // cell-cell signaling // traceable author statement /// 8283 // cell p…	5615 // extracellular space // traceable author statement	4871 // signal transducer activity // traceable author statement /// 5149 // interleukin-1 receptor binding // non-traceable author statement	---	---	scop // d1i1b__ // d1i1b__ SCOP:b.42.1.2:| Interleukin-1beta // 9.72E-56	IPR000975 // Interleukin-1 /// IPR002348 // Interleukin 1/heparin-binding growth factor /// IPR003294 // Interleukin-1, alpha/beta /// IPR003296 // Interleukin-1, beta IL1B /// IPR008996 // Cytokine, IL-1 related /// IPR003502 // Interleukin-1 propeptide	---	---	39402_at 205067_at	1.51162	0.888977	0.588095		1.50839	1.59698	1.87076	1.20566	1.25518	1.45363	0.885392	1.12809	1.46503
9	201315_x_at	201315_x_at	Hs.174195.0	gb:NM_006435.1 /DB_XREF=gi:10835237 /GEN=IFITM2 /FEA=FLmRNA /CNT=387 /TID=Hs.174195.0 /TIER=FL+Stack /STK=89 /UG=Hs.174195 /LL=10581 /DEF=Homo sapiens interferon induced transmembrane protein 2 (1-8D) (IFITM2), mRNA. /PROD=interferon induced transmembrane protein 2(1-8D) /FL=gb:NM_006435.1	NM_006435	174195	July 2003 (NCBI 34)	chr11:298237-299200 (+)	NM_006435 // interferon induced transmembrane protein 2 (1-8D) // chr11:297914-299392 (+)	interferon induced transmembrane protein 2 (1-8D)	IFITM2	11p15.5	Hs.174195	ENSG00000184323	10581	AAP88861 /// Q01629 /// Q14617	---	605578	NP_006426	NM_006435	---	---	---	---	---	---	6955 // immune response // traceable author statement	16021 // integral to membrane // inferred from electronic annotation	---	---	---	pfam // CD225 // Interferon-induced transmembrane protein // 4.1E-64	IPR007593 // Interferon-induced transmembrane protein	NP_006426 // 2 // 0.22337	---	201315_x_at	0.984626	0.497399	0.505166		2.55288	2.48913	2.49814	1.60705	1.78052	1.58865	1.597	2.03519	2.11316
9	208910_s_at 214214_s_at	208910_s_at	Hs.78614.0	gb:L04636.1 /DB_XREF=gi:338044 /FEA=FLmRNA /CNT=267 /TID=Hs.78614.0 /TIER=FL+Stack /STK=78 /UG=Hs.78614 /LL=708 /UG_GENE=C1QBP /DEF=Homo sapiens pre-mRNA splicing factor 2 p32 subunit (SF2p32) mRNA, complete cds. /PROD=splicing factor /FL=gb:L04636.1 gb:BC000435.1 gb:NM_001212.2	L04636	78614	July 2003 (NCBI 34)	chr17:5536937-5537645 (-)	NM_001212 // complement component 1, q subcomponent binding protein precursor // chr17:5536687-5543036 (-)	complement component 1, q subcomponent binding protein	C1QBP	17p13.3	Hs.78614	ENSG00000108561	708	Q07021 /// Q9NNY8 /// Q9NQ45	---	601269	NP_001203	NM_001212	---	---	---	---	---	---	6955 // immune response // traceable author statement	5759 // mitochondrial matrix // inferred from electronic annotation /// 5886 // plasma membrane // traceable author statement	---	---	---	scop // d1p32a_ // d1p32a_ SCOP:d.25.1.1:| Acidic mitochondrial matrix protein p32 // 6.17E-66 /// pfam // MAM33 // Mitochondrial glycoprotein // 1.5E-109	IPR003428 // Mitochondrial glycoprotein	---	---	208910_s_at 214214_s_at	1.24126	0.696309	0.560969		1.71246	1.96583	1.9802	-0.613649	-0.361232	-0.058581	1.13081	0.87794	1.13948
9	205061_s_at 213226_at	205061_s_at	Hs.91728.0	gb:NM_005033.1 /DEF=Homo sapiens polymyositisscleroderma autoantigen 1 (75kD) (PMSCL1), mRNA. /FEA=mRNA /GEN=PMSCL1 /PROD=polymyositisscleroderma autoantigen 1 (75kD) /DB_XREF=gi:4826921 /UG=Hs.91728 polymyositisscleroderma autoantigen 1 (75kD) /FL=gb:M58460.1 gb:NM_005033.1	NM_005033	91728	July 2003 (NCBI 34)	chr4:123193213-123196407 (+)	NM_005033 // polymyositis/scleroderma autoantigen 1, 75kDa // chr4:123182740-123196832 (+)	polymyositis/scleroderma autoantigen 1, 75kDa	PMSCL1	4q27	Hs.91728	ENSG00000123737	5393	Q06265 /// Q86Y41 /// Q86Y48	---	606180	NP_005024	NM_005033	---	---	---	---	---	---	6364 // rRNA processing // non-traceable author statement /// 6955 // immune response // non-traceable author statement	176 // nuclear exosome (RNase complex) // non-traceable author statement /// 5730 // nucleolus // traceable author statement	175 // 3'-5' exoribonuclease activity // non-traceable author statement /// 3723 // RNA binding // non-traceable author statement /// 4527 // exonuclease activity // inferred from electronic annotation /// 16787 // hydrolase activity // inferred from electronic annotation	---	---	pfam // RNase_PH_C // 3' exoribonuclease family, domain 2 // 9.7E-4	IPR001247 // 3' exoribonuclease	---	---	205061_s_at 213226_at	1.35548	0.561671	0.41437		-0.0866051	-0.179154	-0.37335	-1.43694	-1.23193	-1.24198	-0.782228	-0.492073	-1.0109
9	205904_at 205905_s_at	205904_at	Hs.90598.0	gb:NM_000247.1 /DEF=Homo sapiens MHC class I polypeptide-related sequence A (MICA), mRNA. /FEA=mRNA /GEN=MICA /PROD=MHC class I chain-related gene A protein /DB_XREF=gi:4557750 /UG=Hs.90598 MHC class I polypeptide-related sequence A /FL=gb:NM_000247.1 gb:L14848.1	NM_000247	90598	July 2003 (NCBI 34)	chr6:31484311-31487155 (+)	NM_000247 // MHC class I chain-related gene A protein // chr6:31475570-31487290 (+)	MHC class I polypeptide-related sequence A	MICA	6p21.3	Hs.90598	ENSG00000184444	4276	Q29983 /// Q860W3 /// Q95HA2	---	600169	NP_000238	NM_000247	---	---	---	---	---	---	6950 // response to stress // predicted/computed /// 6968 // cellular defense response // experimental evidence /// 8037 // cell recognition // experimental evidence /// 6955 // MHC_I;immune response;1.2e-11 // extended:inferred from electronic annotation	---	5515 // protein binding // experimental evidence	---	---	scop // d1hyrc1 // d1hyrc1 SCOP:b.1.1.2:| MHC I homolog // 2.84E-22 /// scop // d1hyrc2 // d1hyrc2 SCOP:d.19.1.1:| MHC I homolog // 1.17E-56 /// pfam // MHC_I // Class I Histocompatibility antigen, domains alpha 1 and 2 // 1.4E-11	IPR001039 // Major histocompatibility complex protein, class I /// IPR007110 // Immunoglobulin-like /// IPR003597 // Immunoglobulin C-type	NP_000238 // 1 // 0.02939	---	205904_at 205905_s_at	0.91369	0.514634	0.563248		0.45504	0.423745	-0.018295	-0.881713	-0.952198	-0.903112	-0.897447	-1.02207	-1.07797
9	217456_x_at	217456_x_at	Hs.181392.1	Consensus includes gb:M31183.1 /DEF=Homo sapiens (cosmid clone cd3.3) MHC class I HLA-B51 mRNA, 3 end of cds. /FEA=mRNA /GEN=HLA-B /PROD=MHC class I lymphocyte antigen /DB_XREF=gi:601851 /UG=Hs.181392 major histocompatibility complex, class I, E	M31183	181392	July 2003 (NCBI 34)	chr6:30566491-30567138 (+)	AK127914 // Homo sapiens cDNA FLJ46021 fis, clone SPLEN2021231. // chr6:30565303-30568140 (+)	major histocompatibility complex, class I, E	HLA-E	6p21.3	Hs.381008	ENSG00000137361	3133	O19682 /// O19683 /// P13747 /// Q29939 /// Q7Z367 /// Q9BT83	---	143010	NP_005507	NM_005516	---	---	---	---	---	---	6955 // immune response // inferred from electronic annotation /// 19883 // antigen presentation, endogenous antigen // inferred from electronic annotation /// 19885 // antigen processing, endogenous antigen via MHC class I // inferred from electronic annotation	16021 // integral to membrane // inferred from electronic annotation	30106 // MHC class I receptor activity // traceable author statement	---	---	scop // d1mhea1 // d1mhea1 SCOP:b.1.1.2:| Class I MHC, beta2-microglobulin and alpha-3 domain // 2.19E-29 /// scop // d1mhea2 // d1mhea2 SCOP:d.19.1.1:| MHC class I, alpha-1 and alpha-2 domains // 4.33E-85 /// pfam // MHC_I // Class I Histocompatibility antigen, domains alpha 1 and 2 // 1.3E-140 /// pfam // ig // Immunoglobulin domain // 3.1E-8	IPR003006 // Immunoglobulin/major histocompatibility complex /// IPR003597 // Immunoglobulin C-type /// IPR007110 // Immunoglobulin-like /// IPR001039 // Major histocompatibility complex protein, class I	NP_005507 // 1 // 0.00742	---	217456_x_at	1.081	0.376145	0.347959		1.55029	1.5773	1.68298	1.35847	1.09433	1.35227	0.379475	0.523113	0.638174
9	204806_x_at	204806_x_at	Hs.110309.0	gb:NM_018950.1 /DEF=Homo sapiens major histocompatibility complex, class I, F (HLA-F), mRNA. /FEA=mRNA /GEN=HLA-F /PROD=major histocompatibility complex, class I, F /DB_XREF=gi:9665231 /UG=Hs.110309 major histocompatibility complex, class I, F /FL=gb:NM_018950.1	NM_018950	110309	July 2003 (NCBI 34)	chr6:29800755-29802156 (+)	NM_018950 // major histocompatibility complex, class I, F precursor // chr6:29799191-29802234 (+)	major histocompatibility complex, class I, F	HLA-F	6p21.3	Hs.411958	ENSG00000137403	3134	AAH09260 /// AAH62991 /// BAC86108 /// Q860R0 /// Q861E9 /// Q861F0 /// Q8WLP5 /// Q95HC0	---	143110	NP_061823	NM_018950	---	---	---	---	---	---	6955 // immune response // inferred from electronic annotation /// 19883 // antigen presentation, endogenous antigen // inferred from electronic annotation /// 19885 // antigen processing, endogenous antigen via MHC class I // inferred from electronic annotation	16021 // integral to membrane // inferred from electronic annotation	30106 // MHC class I receptor activity // traceable author statement	---	---	scop // d1hsaa1 // d1hsaa1 SCOP:b.1.1.2:| Class I MHC, beta2-microglobulin and alpha-3 domain // 6.84E-30 /// scop // d1hsaa2 // d1hsaa2 SCOP:d.19.1.1:| MHC class I, alpha-1 and alpha-2 domains // 7.1E-81 /// pfam // MHC_I // Class I Histocompatibility antigen, domains alpha 1 and 2 // 1.7E-133 /// pfam // MHC_I_C // MHC_I C-terminus // 3.3E-6 /// pfam // ig // Immunoglobulin domain // 2.1E-8	IPR001039 // Major histocompatibility complex protein, class I /// IPR007110 // Immunoglobulin-like /// IPR003006 // Immunoglobulin/major histocompatibility complex /// IPR003597 // Immunoglobulin C-type	NP_061823 // 1 // 0.02506	---	204806_x_at	1.28578	0.476921	0.370919		1.21274	1.33253	1.41371	0.205987	0.426383	0.392009	-0.0180481	0.12882	0.170788
9	208729_x_at 209140_x_at 211911_x_at	208729_x_at	Hs.77961.1	gb:D83043.1 /DEF=Human HLA-B mRNA, allele A*2711, complete cds. /FEA=mRNA /GEN=HLA-B /DB_XREF=gi:1871135 /UG=Hs.77961 major histocompatibility complex, class I, B /FL=gb:U36492.1 gb:U35431.1 gb:L37881.1 gb:U31971.1 gb:L42345.1 gb:U50710.1 gb:L41925.1 gb:L41214.1 gb:U27608.1 gb:U35734.1 gb:U70528.1 gb:U70529.1 gb:U80945.1 gb:U64801.1 gb:U09864.1 gb:M77776.1 gb:M77775.1 gb:L04696.1 gb:D83043.1 gb:M…	D83043	77961	July 2003 (NCBI 34)	chr6:31426604-31428227 (-)	NM_005514 // major histocompatibility complex, class I, B // chr6:31426088-31429127 (-)	major histocompatibility complex, class I, B	HLA-B	6p21.3	Hs.77961	ENSG00000187200	3106	O02874 /// O19189 /// O19508 /// O19554 /// O19589 /// O19626 /// O19644 /// O19645 /// O19646 /// O19648 /// O19650 /// O19675 /// O19691 /// O19755 /// O19781 /// O19782 /// O19790 /// O78043 /// O78182 /// O78183 /// O78189 /// O98221 /// P01889 /// P03989 /// P10319 /// P18463 /// P18464 /// P18465 /// P30460 /// P30461 /// P30464 /// P30466 /// P30475 /// P30479 /// P30480 /// P30481 /// P30…	---	142830	NP_005505	NM_005514	---	---	---	---	---	---	6955 // immune response // non-traceable author statement /// 19883 // antigen presentation, endogenous antigen // inferred from electronic annotation /// 19885 // antigen processing, endogenous antigen via MHC class I // inferred from electronic annotation	5887 // integral to plasma membrane // non-traceable author statement	30106 // MHC class I receptor activity // non-traceable author statement	---	---	scop // d1agda2 // d1agda2 SCOP:d.19.1.1:| MHC class I, alpha-1 and alpha-2 domains // 7.32E-87 /// scop // d1hsaa1 // d1hsaa1 SCOP:b.1.1.2:| Class I MHC, beta2-microglobulin and alpha-3 domain // 1.29E-29 /// pfam // MHC_I // Class I Histocompatibility antigen, domains alpha 1 and 2 // 2.8E-146 /// pfam // MHC_I_C // MHC_I C-terminus // 1.1E-7 /// pfam // ig // Immunoglobulin domain // 1.4E-8	IPR001039 // Major histocompatibility complex protein, class I /// IPR000803 // Facilitated glucose transporter /// IPR007110 // Immunoglobulin-like /// IPR010579 // MHC_I, C-terminal /// IPR003006 // Immunoglobulin/major histocompatibility complex /// IPR003597 // Immunoglobulin C-type	NP_005505 // 1 // 0.14864	---	208729_x_at 209140_x_at 211911_x_at	1.525	0.59646	0.391122		2.32951	2.23156	2.37391	1.10819	1.19372	1.05529	0.634221	0.473345	0.780179
10	203153_at	203153_at	Hs.20315.0	gb:NM_001548.1 /DB_XREF=gi:4504584 /GEN=IFIT1 /FEA=FLmRNA /CNT=170 /TID=Hs.20315.0 /TIER=FL+Stack /STK=17 /UG=Hs.20315 /LL=3434 /DEF=Homo sapiens interferon-induced protein with tetratricopeptide repeats 1 (IFIT1), mRNA. /PROD=interferon-induced protein withtetratricopeptide repeats 1 /FL=gb:NM_001548.1 gb:M24594.1	NM_001548	20315	July 2003 (NCBI 34)	chr10:90827611-90828120 (+)	NM_001548 // interferon-induced protein with tetratricopeptide repeats 1 // chr10:90816982-90828187 (+)	interferon-induced protein with tetratricopeptide repeats 1	IFIT1	10q25-q26	Hs.20315	ENSG00000185745	3434	AAP35313 /// P09914	---	147690	NP_001539	NM_001548	---	---	---	---	---	---	6955 // immune response // inferred from electronic annotation	5737 // cytoplasm // non-traceable author statement	---	---	---	pfam // TPR // TPR Domain // 8.9E-7 /// pfam // TPR // TPR Domain // 0.036 /// pfam // TPR // TPR Domain // 0.4 /// pfam // TPR // TPR Domain // 0.46 /// pfam // TPR // TPR Domain // 0.47 /// pfam // TPR // TPR Domain // 0.65	IPR001440 // TPR repeat /// IPR008941 // TPR-like	---	---	203153_at	0.945581	0.738766	0.781283		0.269359	-0.625027	0.249152	-1.60855	-1.29197	-1.34252	-1.93609	-2.54778	-1.96991
10	212203_x_at	212203_x_at	Hs.182241.2	gb:BF338947 /DB_XREF=gi:11285367 /DB_XREF=602036012F1 /CLONE=IMAGE:4184090 /FEA=EST /CNT=161 /TID=Hs.182241.2 /TIER=Stack /STK=13 /UG=Hs.182241 /LL=10410 /UG_GENE=IFITM3 /UG_TITLE=interferon induced transmembrane protein 3 (1-8U)	BF338947	182241	July 2003 (NCBI 34)	chr11:309702-310830 (-)	NM_021034 // interferon-induced transmembrane protein 3 (1-8U) // chr11:309668-311050 (-)	interferon induced transmembrane protein 3 (1-8U)	IFITM3	11p15.5	Hs.374650	ENSG00000184323	10410	AAP35538 /// Q01628	---	605579	NP_066362	NM_021034	---	---	---	---	---	---	6955 // immune response // traceable author statement	16021 // integral to membrane // inferred from electronic annotation	---	---	---	pfam // CD225 // Interferon-induced transmembrane protein // 2.4E-65	IPR007593 // Interferon-induced transmembrane protein	NP_066362 // 2 // 0.03793	---	212203_x_at	1.19959	1.02029	0.850533		5.45993	5.2671	4.64201	3.6238	3.91109	3.819	3.74662	3.89595	4.36268
10	201601_x_at 214022_s_at	201601_x_at	Hs.146360.0	gb:NM_003641.1 /DEF=Homo sapiens interferon induced transmembrane protein 1 (9-27) (IFITM1), mRNA. /FEA=mRNA /GEN=IFITM1 /PROD=interferon induced transmembrane protein 1(9-27) /DB_XREF=gi:4504580 /UG=Hs.146360 interferon induced transmembrane protein 1 (9-27) /FL=gb:BC000897.1 gb:J04164.1 gb:NM_003641.1	NM_003641	146360	July 2003 (NCBI 34)	chr11:304115-305162 (+)	NM_003641 // interferon induced transmembrane protein 1 (9-27) // chr11:304061-305272 (+)	interferon induced transmembrane protein 1 (9-27)	IFITM1	11p15.5	Hs.458414	---	8519	AAP35837 /// P13164	---	604456	NP_003632	NM_003641	---	---	---	---	---	---	74 // regulation of cell cycle // traceable author statement /// 6955 // immune response // inferred from electronic annotation /// 7166 // cell surface receptor linked signal transduction // traceable author statement /// 8285 // negative regulation of cell proliferation // traceable author statement	5886 // plasma membrane // traceable author statement /// 16021 // integral to membrane // inferred from electronic annotation	5057 // receptor signaling protein activity // traceable author statement	---	---	pfam // CD225 // Interferon-induced transmembrane protein // 1.3E-65	IPR007593 // Interferon-induced transmembrane protein	NP_003632 // 2 // 0.11753	---	201601_x_at 214022_s_at	1.47052	1.00484	0.68332		3.05404	3.14237	2.54287	1.61967	1.5148	1.91859	0.518299	1.07359	1.2381
10	205483_s_at	205483_s_at	Hs.833.0	gb:NM_005101.1 /DB_XREF=gi:4826773 /GEN=ISG15 /FEA=FLmRNA /CNT=43 /TID=Hs.833.0 /TIER=FL+Stack /STK=16 /UG=Hs.833 /LL=9636 /DEF=Homo sapiens interferon-stimulated protein, 15 kDa (ISG15), mRNA. /PROD=interferon-stimulated protein, 15 kDa /FL=gb:M13755.1 gb:NM_005101.1	NM_005101	833	July 2003 (NCBI 34)	chrUn_random:3228882-3229314 (+)	NM_005101 // interferon, alpha-inducible protein (clone IFI-15K) // chrUn_random:3228372-3229413 (+)	interferon, alpha-inducible protein (clone IFI-15K)	G1P2	1p36.33	Hs.458485	---	9636	P05161 /// Q7Z2G2	---	147571	NP_005092	NM_005101	---	---	---	---	---	---	6955 // immune response // inferred from electronic annotation /// 7267 // cell-cell signaling // non-traceable author statement	5615 // extracellular space // non-traceable author statement /// 5737 // cytoplasm // non-traceable author statement	5515 // protein binding // non-traceable author statement	---	---	scop // d1ubi__ // d1ubi__ SCOP:d.15.1.1:| Ubiquitin // 2.26E-17 /// pfam // ubiquitin // Ubiquitin family // 4.2E-23 /// pfam // ubiquitin // Ubiquitin family // 1.1E-5	IPR000626 // Ubiquitin	---	---	205483_s_at	1.23364	0.741381	0.600969		2.20311	1.78204	1.69484	0.609566	0.594895	0.268472	-0.34936	0.048909	0.285491
10	202086_at	202086_at	Hs.76391.0	gb:NM_002462.1 /DB_XREF=gi:4505290 /GEN=MX1 /FEA=FLmRNA /CNT=203 /TID=Hs.76391.0 /TIER=FL+Stack /STK=91 /UG=Hs.76391 /LL=4599 /DEF=Homo sapiens myxovirus (influenza) resistance 1, homolog of murine (interferon-inducible protein p78) (MX1), mRNA. /PROD=myxovirus (influenza) resistance 1, homolog ofmurine (interferon-inducible protein p78) /FL=gb:NM_002462.1 gb:M30817.1 gb:M33882.1	NM_002462	76391	July 2003 (NCBI 34)	chr21:41750953-41751452 (+)	NM_002462 // myxovirus resistance protein 1 // chr21:41718549-41751534 (+)	myxovirus (influenza virus) resistance 1, interferon-inducible protein p78 (mouse)	MX1	21q22.3	Hs.436836	ENSG00000157601	4599	P20591 /// Q86YP5 /// Q8NAA8	---	147150	NP_002453	NM_002462	---	---	---	---	---	---	6917 // induction of apoptosis // traceable author statement /// 6955 // immune response // inferred from electronic annotation /// 7165 // signal transduction // traceable author statement /// 9405 // pathogenesis // traceable author statement	5737 // cytoplasm // not recorded	3800 // antiviral response protein activity // not recorded /// 3924 // GTPase activity // not recorded /// 5525 // GTP binding // traceable author statement	---	---	scop // d1jwyb_ // d1jwyb_ SCOP:c.37.1.8:| Dynamin G domain // 1.18E-99 /// pfam // Dynamin_M // Dynamin central region // 9.2E-186 /// pfam // Dynamin_N // Dynamin family // 2.3E-153 /// pfam // GED // Dynamin GTPase effector domain // 3.0E-42	IPR001401 // Dynamin /// IPR000375 // Dynamin central region /// IPR003130 // Dynamin GTPase effector	---	---	202086_at	1.64075	0.948623	0.578164		2.20042	2.23805	2.30049	0.461304	0.801589	1.06074	-0.172357	0.12782	0.40963
10	204470_at	204470_at	Hs.789.0	gb:NM_001511.1 /DEF=Homo sapiens GRO1 oncogene (melanoma growth stimulating activity, alpha) (GRO1), mRNA. /FEA=mRNA /GEN=GRO1 /PROD=GRO1 oncogene (melanoma growth stimulatingactivity, alpha) /DB_XREF=gi:4504152 /UG=Hs.789 GRO1 oncogene (melanoma growth stimulating activity, alpha) /FL=gb:NM_001511.1	NM_001511	789	July 2003 (NCBI 34)	chr4:75202716-75203149 (+)	NM_001511 // chemokine (C-X-C motif) ligand 1 // chr4:75201421-75203204 (+)	chemokine (C-X-C motif) ligand 1 (melanoma growth stimulating activity, alpha)	CXCL1	4q21	Hs.789	ENSG00000163739	2919	AAP35526 /// P09341	---	155730	NP_001502	NM_001511	---	---	---	---	---	---	6935 // chemotaxis // traceable author statement /// 6954 // inflammatory response // traceable author statement /// 6955 // immune response // inferred from electronic annotation /// 7186 // G-protein coupled receptor protein signaling pathway // traceable author statement /// 7242 // intracellular signaling cascade // traceable author statement /// 7401 // pan-neural process // traceable author…	5615 // extracellular space // traceable author statement /// 5625 // soluble fraction // not recorded	8009 // chemokine activity // traceable author statement /// 8047 // enzyme activator activity // traceable author statement /// 8083 // growth factor activity // inferred from electronic annotation	---	---	scop // d1mgsa_ // d1mgsa_ SCOP:d.9.1.1:| Melanoma growth stimulating activity (MGSA) // 3.25E-23 /// pfam // IL8 // Small cytokines (intecrine/chemokine), interleukin-8 like // 9.8E-31	IPR001811 // Small chemokine, interleukin-8 like /// IPR002473 // Small chemokine, C-X-C/Interleukin 8 /// IPR001089 // Small chemokine, C-X-C subfamily	---	---	204470_at	1.38216	0.986604	0.713813		0.137152	-0.202714	0.46253	-2.06221	-2.18796	-2.06586	-1.9432	-2.49323	-1.59618
10	211530_x_at	211530_x_at	Hs.73885.2	gb:M90686.1 /DB_XREF=gi:184213 /GEN=HLA-G3 /FEA=FLmRNA /CNT=1 /TID=Hs.73885.2 /TIER=FL /STK=0 /UG=Hs.73885 /LL=3135 /DEF=Human lymphocyte antigen (HLA-G3) mRNA, complete cds. /PROD=b2 microglobulin /FL=gb:M90686.1	M90686	73885	July 2003 (NCBI 34)	chr6:29903834-29906604 (+)	NM_002127 // major histocompatibility complex, class I, G precursor // chr6:29903627-29906806 (+)	HLA-G histocompatibility antigen, class I, G	HLA-G	6p21.3	Hs.512152	ENSG00000168745	3135	AAQ83724 /// O02923 /// O02924 /// O02925 /// O02926 /// O02927 /// O02928 /// O02929 /// O78131 /// O78132 /// O78133 /// O78134 /// O78135 /// O78136 /// P17693 /// Q29897 /// Q30182 /// Q31611 /// Q8WLS1 /// Q95HM6 /// Q9MYA2 /// Q9UM45	---	142871	NP_002118	NM_002127	---	---	---	---	---	---	6968 // cellular defense response // traceable author statement /// 9596 // perception of pest/pathogen/parasite // traceable author statement /// 19883 // antigen presentation, endogenous antigen // inferred from electronic annotation /// 19885 // antigen processing, endogenous antigen via MHC class I // inferred from electronic annotation /// 6955 // MHC_I;immune response;1.4e-142 // extended:i…	16021 // integral to membrane // inferred from electronic annotation	30106 // MHC class I receptor activity // traceable author statement	---	---	scop // d1qqda1 // d1qqda1 SCOP:b.1.1.2:| Class I MHC, beta2-microglobulin and alpha-3 domain // 7.49E-29 /// scop // d1qqda2 // d1qqda2 SCOP:d.19.1.1:| MHC class I, alpha-1 and alpha-2 domains // 3.46E-85 /// pfam // MHC_I // Class I Histocompatibility antigen, domains alpha 1 and 2 // 1.7E-142 /// pfam // ig // Immunoglobulin domain // 2.5E-7	IPR001039 // Major histocompatibility complex protein, class I /// IPR007110 // Immunoglobulin-like /// IPR003006 // Immunoglobulin/major histocompatibility complex /// IPR003597 // Immunoglobulin C-type	NP_002118 // 1 // 0.07424	---	211530_x_at	1.56633	0.787056	0.502484		2.16553	1.79329	2.17884	0.904327	1.14199	1.04835	0.03787	-0.07876	0.047824
10	206247_at	206247_at	Hs.211580.0	gb:NM_005931.1 /DB_XREF=gi:5174564 /GEN=MICB /FEA=FLmRNA /CNT=22 /TID=Hs.211580.0 /TIER=FL /STK=1 /UG=Hs.211580 /LL=4277 /DEF=Homo sapiens MHC class I polypeptide-related sequence B (MICB), mRNA. /PROD=MHC class I polypeptide-related sequence B /FL=gb:NM_005931.1	NM_005931	211580	July 2003 (NCBI 34)	chr6:31582710-31583210 (+)	NM_005931 // MHC class I polypeptide-related sequence B // chr6:31570310-31583240 (+)	MHC class I polypeptide-related sequence B	MICB	6p21.3	Hs.211580	ENSG00000137315	4277	O19798 /// O19799 /// O19800 /// O19801 /// O19802 /// O19803 /// O78099 /// O78100 /// O78101 /// O78102 /// O78103 /// O78104 /// Q29980 /// Q861E6	---	602436	NP_005922	NM_005931	---	---	---	---	---	---	6950 // response to stress // traceable author statement /// 6968 // cellular defense response // traceable author statement /// 8037 // cell recognition // traceable author statement /// 6955 // MHC_I;immune response;1.3e-15 // extended:inferred from electronic annotation	16021 // integral to membrane // inferred from electronic annotation	5515 // protein binding // traceable author statement	---	---	scop // d1je6a1 // d1je6a1 SCOP:b.1.1.2:| MHC I homolog // 7.51E-23 /// scop // d1je6a2 // d1je6a2 SCOP:d.19.1.1:| MHC I homolog // 1.78E-60 /// pfam // MHC_I // Class I Histocompatibility antigen, domains alpha 1 and 2 // 1.5E-15 /// pfam // ig // Immunoglobulin domain // 9.5E-5	IPR001039 // Major histocompatibility complex protein, class I /// IPR007110 // Immunoglobulin-like /// IPR003597 // Immunoglobulin C-type	---	---	206247_at	1.80355	0.990286	0.549075		-0.141114	-0.093998	-0.0127871	-2.34831	-2.54434	-2.58844	-1.94925	-2.48483	-2.57743
11	221470_s_at	221470_s_at	Hs.166371.1	gb:NM_014439.1 /DEF=Homo sapiens Interleukin-1 Superfamily z (FIL1(ZETA)), mRNA. /FEA=CDS /GEN=FIL1(ZETA) /PROD=Interleukin-1 Superfamily z /DB_XREF=gi:7657093 /UG=Hs.166371 Interleukin-1 Superfamily z /FL=gb:AF201832.1 gb:NM_014439.1	NM_014439	166371	July 2003 (NCBI 34)	chr2:113769870-113770372 (+)	NM_014439 // interleukin 1 family, member 7 isoform 1 proprotein // chr2:113767915-113771602 (+) /// NM_173202 // interleukin 1 family, member 7 isoform 2 // chr2:113767915-113771602 (+) /// NM_173205 // interleukin 1 family, member 7 isoform 5 // chr2:113767915-113771602 (+)	interleukin 1 family, member 7 (zeta)	IL1F7	2q12-q14.1	Hs.166371	ENSG00000125571	27178	Q9NZH6	---	605510	NP_055254 /// NP_775294 /// NP_775295 /// NP_775296 /// NP_775297	NM_014439 /// NM_173202 /// NM_173203 /// NM_173204 /// NM_173205	---	---	---	---	---	---	6955 // immune response // non-traceable author statement	5576 // extracellular // traceable author statement	5152 // interleukin-1 receptor antagonist activity // inferred from electronic annotation /// 5149 // IL1;interleukin-1 receptor binding;0.0001 // extended:Unknown /// 5149 // IL1;interleukin-1 receptor binding;1.7e-05 // extended:Unknown /// 5149 // IL1;interleukin-1 receptor binding;5.9e-12 // extended:Unknown	---	---	scop // d1ilr1_ // d1ilr1_ SCOP:b.42.1.2:| Interleukin-1 receptor antagonist protein // 9.86E-44 /// scop // d1ilr1_ // d1ilr1_ SCOP:b.42.1.2:| Interleukin-1 receptor antagonist protein // 9.86E-44 /// scop // d1ilr1_ // d1ilr1_ SCOP:b.42.1.2:| Interleukin-1 receptor antagonist protein // 7.29E-36 /// scop // d1ilr1_ // d1ilr1_ SCOP:b.42.1.2:| Interleukin-1 receptor antagonist protein // 1.42E-38…	IPR000975 // Interleukin-1 /// IPR003297 // Interleukin-1 receptor antagonist IL1RA /// IPR008996 // Cytokine, IL-1 related	---	---	221470_s_at	2.1634	1.52421	0.704545		-2.89933	-3.60068	-3.66328	-0.302661	-1.3222	-1.13179	-1.57927	-1.00623	-1.59116
11	218002_s_at	218002_s_at	Hs.24395.0	gb:NM_004887.1 /DEF=Homo sapiens small inducible cytokine subfamily B (Cys-X-Cys), member 14 (BRAK) (SCYB14), mRNA. /FEA=mRNA /GEN=SCYB14 /PROD=small inducible cytokine subfamily B(Cys-X-Cys), member 14 (BRAK) /DB_XREF=gi:4757869 /UG=Hs.24395 small inducible cytokine subfamily B (Cys-X-Cys), member 14 (BRAK) /FL=gb:BC003513.1 gb:AF073957.1 gb:NM_004887.1 gb:AF144103.1 gb:AF106911.1	AF144103	24395	July 2003 (NCBI 34)	chr5:134986476-134990635 (-)	NM_004887 // small inducible cytokine B14 precursor // chr5:134982590-134991185 (-)	chemokine (C-X-C motif) ligand 14	CXCL14	5q31	Hs.24395	ENSG00000145824	9547	AAQ89265 /// O95715 /// Q9NS21	---	604186	NP_004878	NM_004887	---	---	---	---	---	---	6935 // chemotaxis // traceable author statement /// 6954 // inflammatory response // not recorded /// 6955 // immune response // not recorded /// 7165 // signal transduction // traceable author statement /// 7267 // cell-cell signaling // traceable author statement	5576 // extracellular // inferred from electronic annotation	8009 // chemokine activity // traceable author statement	---	---	pfam // IL8 // Small cytokines (intecrine/chemokine), interleukin-8 like // 0.0016	IPR001811 // Small chemokine, interleukin-8 like /// IPR002473 // Small chemokine, C-X-C/Interleukin 8 /// IPR001089 // Small chemokine, C-X-C subfamily	NP_004878 // 1 // 0.01926	---	218002_s_at	4.50632	2.41245	0.535349		-2.06792	-2.20102	-2.11126	-1.41555	-1.5654	-1.95189	-0.164217	-0.583673	-0.885633
11	209309_at	209309_at	Hs.71.0	gb:D90427.1 /DEF=Human mRNA for zinc-alpha2-glycoprotein, complete cds. /FEA=mRNA /PROD=zinc-alpha2-glycoprotein precursor /DB_XREF=gi:220150 /UG=Hs.71 alpha-2-glycoprotein 1, zinc /FL=gb:D90427.1 gb:M76707.1 gb:NM_001185.1	D90427	71	July 2003 (NCBI 34)	chr7:99175809-99177219 (-)	NM_001185 // alpha-2-glycoprotein 1, zinc // chr7:99175757-99185042 (-)	alpha-2-glycoprotein 1, zinc	AZGP1	7q22.1	Hs.512643	ENSG00000160862	563	P25311 /// Q8N4N0	---	194460	NP_001176	NM_001185	---	---	---	---	---	---	6955 // immune response // inferred from electronic annotation	5615 // extracellular space // not recorded /// 5625 // soluble fraction // not recorded /// 16020 // membrane // inferred from electronic annotation	---	---	---	scop // d1qo3a2 // d1qo3a2 SCOP:d.19.1.1:| MHC class I, alpha-1 and alpha-2 domains // 2.04E-56 /// scop // d1zaga1 // d1zaga1 SCOP:b.1.1.2:| Zinc-alpha-2-glycoprotein, ZAG // 6.07E-27 /// pfam // MHC_I // Class I Histocompatibility antigen, domains alpha 1 and 2 // 3.1E-96 /// pfam // ig // Immunoglobulin domain // 1.3E-10	IPR001039 // Major histocompatibility complex protein, class I /// IPR007110 // Immunoglobulin-like /// IPR003006 // Immunoglobulin/major histocompatibility complex /// IPR003597 // Immunoglobulin C-type	---	---	209309_at	2.26395	1.72662	0.762657		-3.07784	-2.76407	-3.61654	0.341577	-0.68722	-0.592233	-0.346021	-0.0565549	0.284068
[truncated: 6 more columns]
