# Supplementary material for: Dynamic and Physical Clustering of Gene Expression during Epidermal Barrier Formation in Differentiating Keratinocytes
Source: PLoS One. 2009 Oct 30;4(10):e7651. doi: 10.1371/journal.pone.0007651 (PMC2766255; doi:10.1371/journal.pone.0007651)
Supplement: Table S6 — Calcium binding genes genes expressed in Keratinocytes during differentiation (0.02 MB XLS) [file pone.0007651.s007.xls]

## Sheet: Sheet1
exC	Gene Name	Gene ID	Location
1	nidogen 2 (osteonidogen)	NID2	14q21-q22
1	dual oxidase 2	DUOX2	15q15.3
1	KIAA0703 gene product	KIAA0703	16q24.1
1	egf-like module containing, mucin-like, hormone receptor-like 2	EMR2	19p13.1
1	microtubule-actin crosslinking factor 1	MACF1	1p32-p31
1	very low density lipoprotein receptor	VLDLR	9p24
2	deoxyribonuclease I-like 2	DNASE1L2	16p13.3
2	annexin A9	ANXA9	1q21
2	transglutaminase 3	TGM3	20q11.2
3	calmodulin-like 5	CALML5	10p15.1
3	desmoglein 1	DSG1	18q12.1
3	desmocollin 1	DSC1	18q12.2
3	S100 calcium binding protein A9 (calgranulin B)	S100A9	1q21
3	S100 calcium binding protein A8 (calgranulin A)	S100A8	1q21
3	S100 calcium binding protein P	S100P	4p16
4	ras homolog gene family, member T1	ARHT1	17q12
4	desmocollin 3	DSC3	18q12.1
4	ATPase, Ca++ transporting, plasma membrane 4	ATP2B4	1q25-q32
4	protein S (alpha)	PROS1	3p11-q11.2
4	protein phosphatase 2, regulatory subunit B, alpha	PPP2R3A	3q22.1
4	mutated in colorectal cancers	MCC	5q21-q22
4	syntrophin, beta 1	SNTB1	8q23-q24
5	transmembrane gamma-carboxyglutamic acid protein 4	TMG4	11p13
5	phospholipase A2, group IVB (cytosolic)	PLA2G4B	15q11.2-q21.3
5	dual oxidase 1	DUOX1	15q15.3
5	desmocollin 2	DSC2	18q12.1
5	desmoglein 3 (pemphigus vulgaris antigen)	DSG3	18q12.1-q12.2
5	Notch homolog 2 (Drosophila)	NOTCH2	1p13-p11
5	cadherin, EGF LAG seven-pass G-type receptor 2	CELSR2	1p21
5	thrombomodulin	THBD	20p12-cen
5	visinin-like 1	VSNL1	2p24.3
5	phospholipase C, delta 1	PLCD1	3p22-p21.3
5	protease, serine, 2 (trypsin 2)	PRSS2	7q34
5	gelsolin (amyloidosis, Finnish type)	GSN	9q33
6	transglutaminase 1	TGM1	14q11.2
6	Notch homolog 3 (Drosophila)	NOTCH3	19p13.2-p13.1
6	S100 calcium binding protein A7 (psoriasin 1)	S100A7	1q21
6	S100 calcium binding protein A12 (calgranulin C)	S100A12	1q21
7	cytochrome P450, family 27, subfamily B, polypeptide 1	CYP27B1	12q13.1-q13.3
7	actinin, alpha 1	ACTN1	14q24.1-q24.2
7	annexin A3	ANXA3	4q13-q22
8	matrix metalloproteinase 1	MMP1	11q22.3
8	annexin A2	ANXA2	15q21-q22
8	cadherin 3, type 1, P-cadherin (placental)	CDH3	16q22.1
8	low density lipoprotein receptor (familial hypercholesterolemia)	LDLR	19p13.3
8	FXYD domain containing ion transport regulator 5	FXYD5	19q12-q13.1
8	S100 calcium binding protein A10	S100A10	1q21
8	jagged 1 (Alagille syndrome)	JAG1	20p12.1-p11.23
8	calmodulin 2 (phosphorylase kinase, delta)	CALM2	2p21
8	follistatin-like 1	FSTL1	3q13.33
8	protein phosphatase 3, catalytic subunit, alpha isoform (calcineurin A alpha)	PPP3CA	4q21-q24
8	FAT tumor suppressor homolog 1 (Drosophila)	FAT	4q34-q35
8	fibrillin 2	FBN2	5q23-q31
8	calbindin 1, 28kDa	CALB1	8q21.3-q22.1
8	annexin A1	ANXA1	9q12-q21.2
9	growth arrest-specific 6	GAS6	13q34
9	hypothetical protein MGC4342	MGC4342	1p36.13
9	calsyntenin 1	CLSTN1	1p36.22
9	intersectin 1 (SH3 domain protein)	ITSN1	21q22.1-q22.2
9	BH-protocadherin (brain-heart)	PCDH7	4p15
9	coagulation factor II (thrombin) receptor-like 1	F2RL1	5q13
9	sorcin	SRI	7q21.1
9	calumenin	CALU	7q32
9	protein phosphatase 2C, magnesium-dependent, catalytic subunit	PPM2C	8q22.1
10	thrombospondin 1	THBS1	15q15
10	desmoglein 2	DSG2	18q12.1
10	calcium-binding transporter	SLC25A24	1p13.3
10	agrin	AGRN	1p36.33
10	calpain 2, (m/II) large subunit	CAPN2	1q41-q42
10	phospholipid scramblase 1	PLSCR1	3q23
10	secreted protein, acidic, cysteine-rich (osteonectin)	SPARC	5q31.3-q32
10	thrombospondin 2	THBS2	6q27
10	aspartate beta-hydroxylase	ASPH	8q12.1
11	calmodulin-like 3	CALML3	10pter-p13
